# Supplementary material for: Three-dimensional building of anisotropic gold nanoparticles under confinement in submicron capsules
Source: Royal Society of Chemistry journal article supplement (doi:10.1039/d3na00683b), 2023-01-01
Supplement: d3na00683b1.pdf [file d3na00683b1.pdf]

## Supporting Information

# Three-Dimensional Building of Anisotropic Gold Nanoparticles under Confinement in Submicron Capsules

Ryuichi Yamada,<sup>†</sup> Makoto Kuwahara,<sup>‡,§</sup> and Shota Kuwahara<sup>\*,†</sup>

<sup>†</sup>Department of Chemistry, Faculty of Science, Toho University, 2-2-1 Miyama, Funabashi, Chiba 274-8510, Japan

<sup>‡</sup>Graduate School of Engineering, Nagoya University, Furo-cho, Chikusa, Nagoya 464-8603, Japan

<sup>§</sup>Institute of Materials and Systems for Sustainability and Institute of Materials and Systems for Sustainability, Nagoya University, Furo-cho, Chikusa, Nagoya 464-8603, Japan

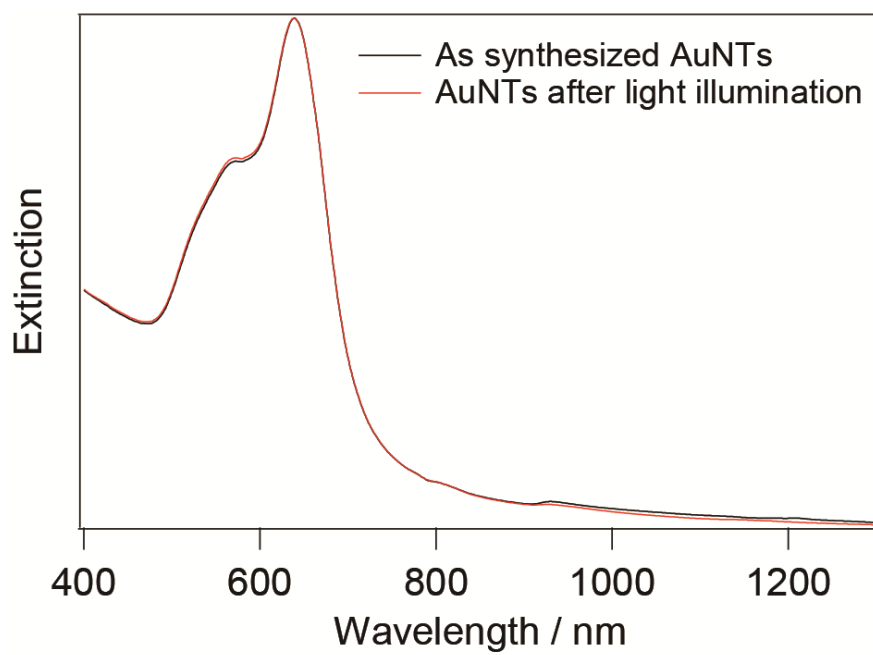

**Figure S1.** Optical absorption spectra of AuNTs obtained (black) before and (red) after light illumination ( $\lambda > 600$  nm) for 1 h.

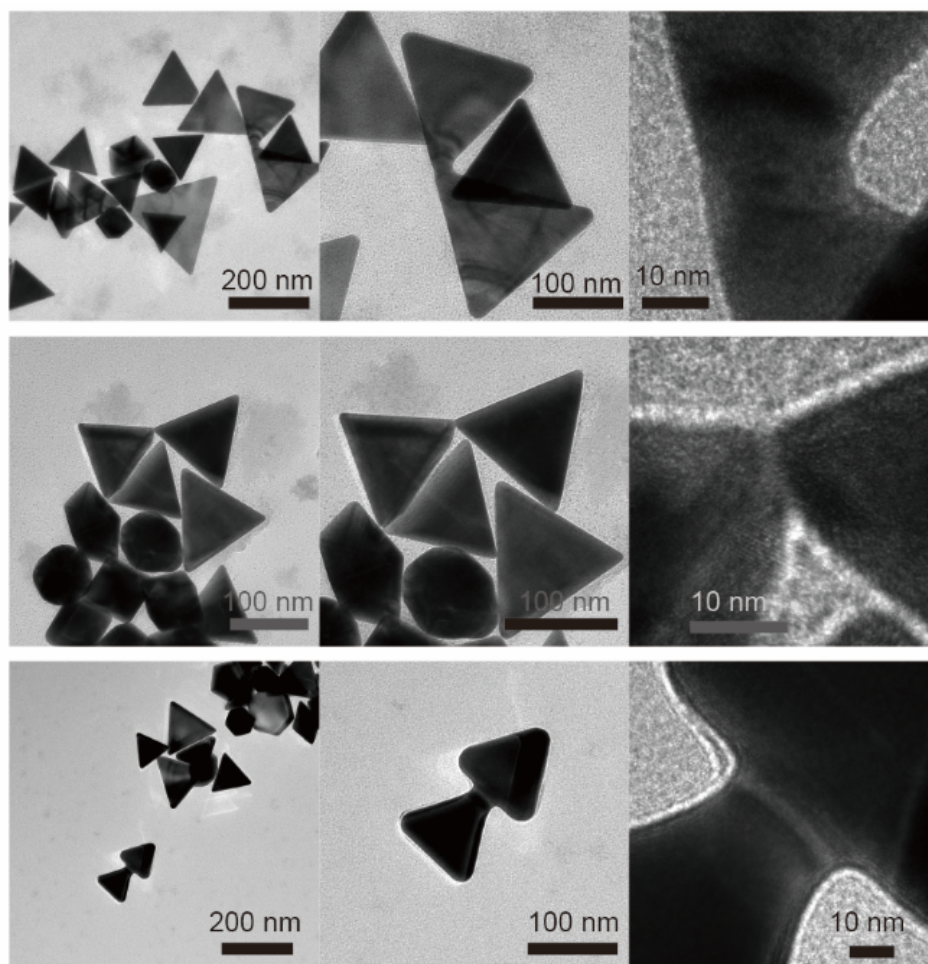

**Figure S2.** Transmission electron microscopy (TEM) images of welded gold nanotriangles (AuNTs) obtained after light illumination ( $\lambda > 600$  nm) from Figure 1c at different magnifications.

a)

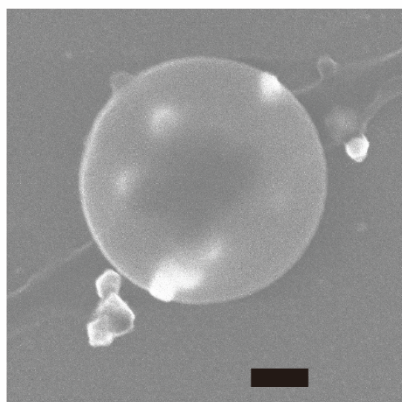

b)

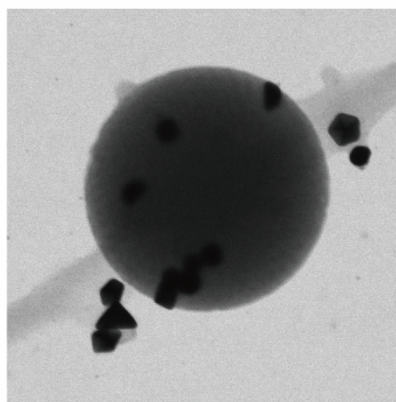

**Figure S3.** (a) SE and (b) bright-field STEM images of a synthesized gold NP encapsulated in silica nanocapsule (scale bar: 100 nm).

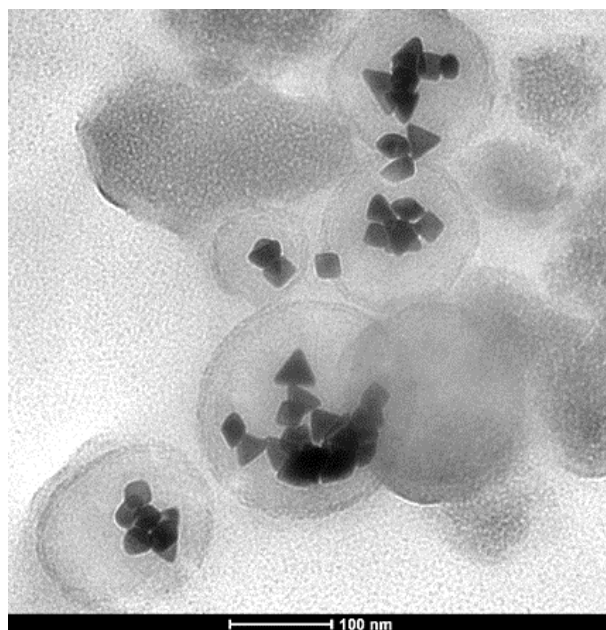

**Figure S4.** Representative TEM image of the encapsulated gold NPs to obtain Figure 2d.

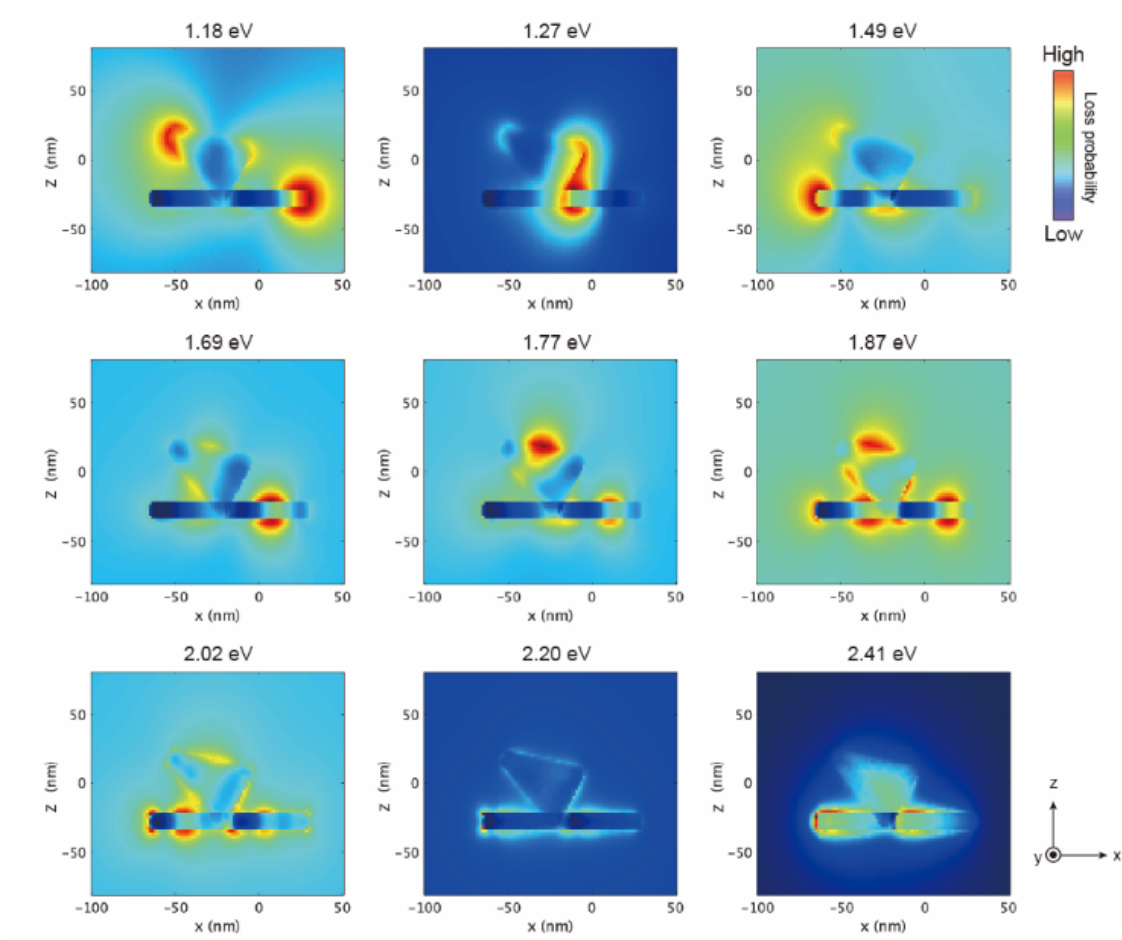

**Figure S5.** Simulated EEL maps of the welded gold nanostructure observed in Fig. 3a. The welding two AuNTs was placed on the xy plane, and observed from y-axis.
